# Supplementary material for: Dielectric properties of solution-processed BaTiO3–styrene butadiene styrene nanocomposite films
Source: Royal Society of Chemistry journal article supplement (doi:10.1039/c9ce01912j), 2020-01-01

## Supporting Information

### **Dielectric Properties of Solution-Processed BaTiO<sub>3</sub> -Styrene Butadiene Styrene Nanocomposite Films**

Daniela Caruntu<sup>2,3</sup>, Benard Kavey<sup>1,2</sup>, Suona Paul<sup>1</sup>, Alin Bas<sup>3</sup>, Aurelian Rotaru<sup>\*3</sup> and  
Gabriel Caruntu<sup>\*1,2,3</sup>

**Figure caption:** FT-IR spectrum of neat oleic acid (yellow curve) and oleic acid-capped 10 nm BaTiO<sub>3</sub> colloidal nanocrystals (maroon curve)

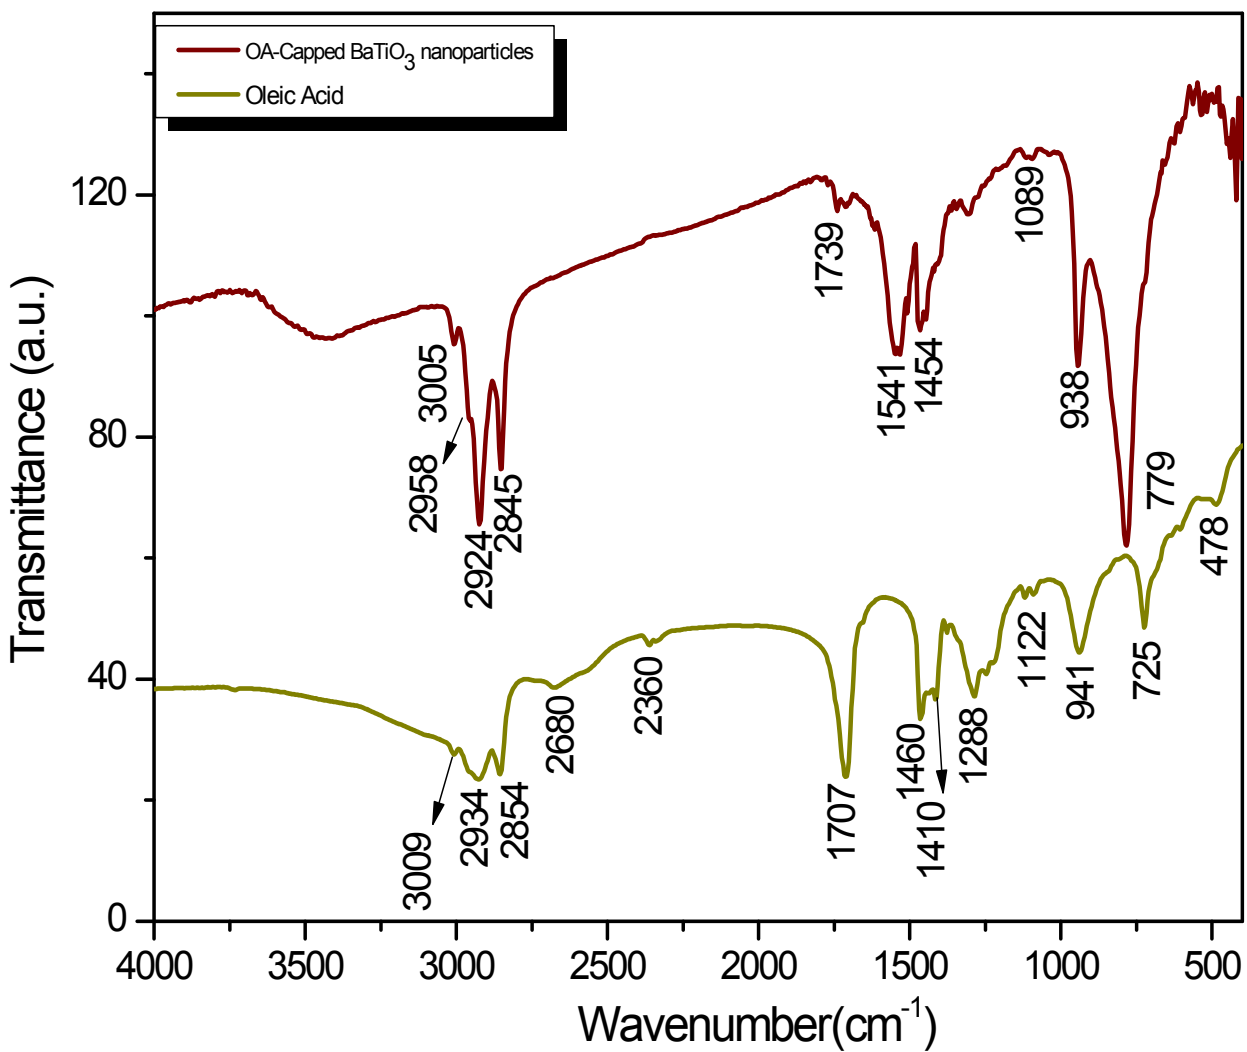

Supplement: c9ce01912j1.pdf [file c9ce01912j1.pdf]
